# Supplementary material
Source: bioRxiv or medRxiv preprint supplement (https://www.biorxiv.org/highwire/filestream/128751/field_highwire_adjunct_files/1/427534-2.pdf)

# Supplemental 2

*α1-copi* pollen

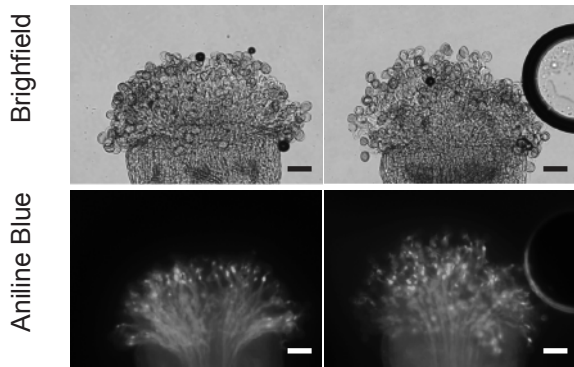

*β-copi* allele 1 pollen

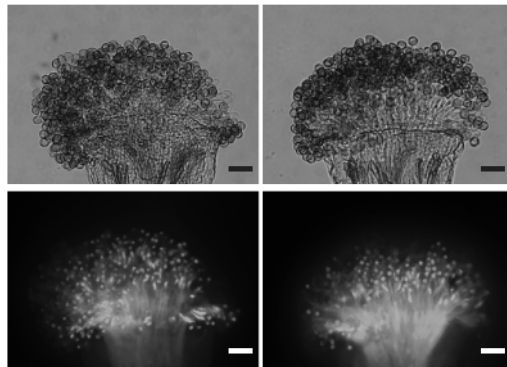

*β-copi* allele 2 pollen

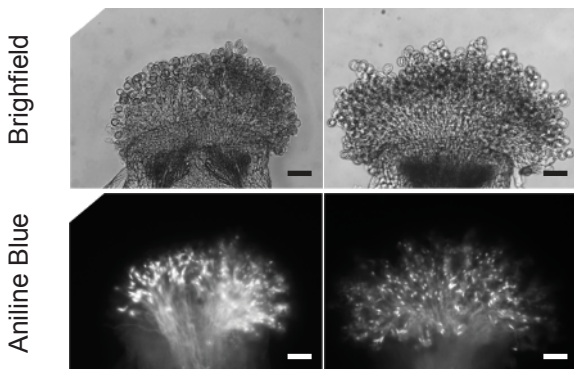

*β'1-copi* pollen

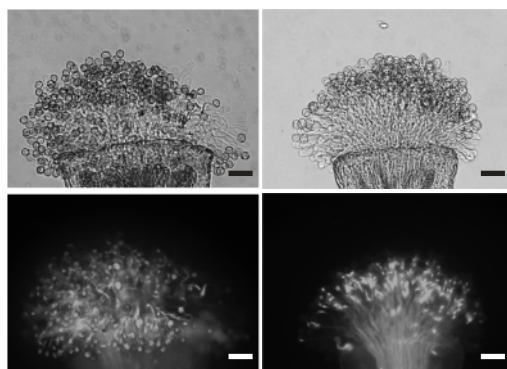

*β'2-copi* pollen

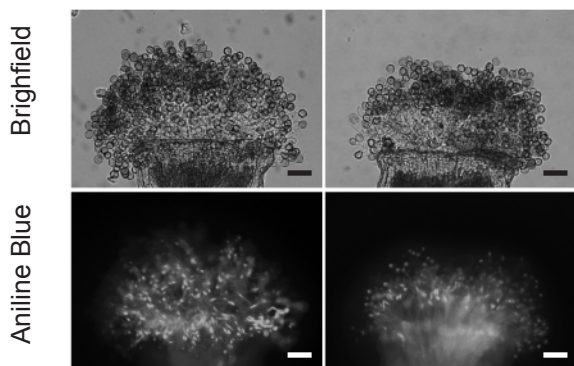

*ξ-copi* pollen

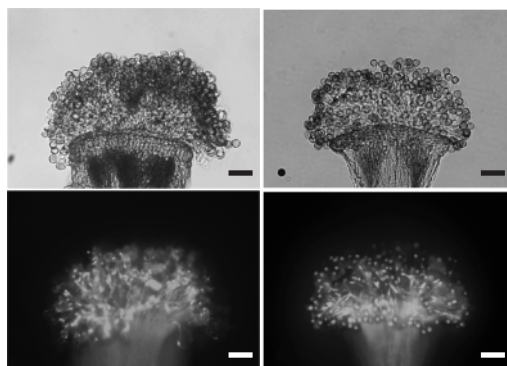

*γ-copi* pollen

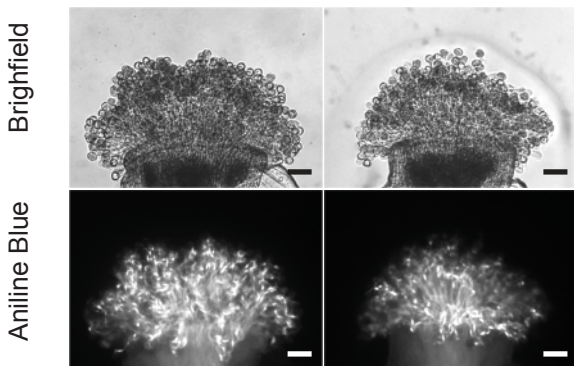

Supplement: Supplementary file [file 427534-2.pdf]
